# Supplementary material
Source: PubMed Central journal article supplement (PMC2912424)
Supplement: NIHMS219682-supplement-1_si_001.pdf [file NIHMS219682-supplement-1_si_001.pdf]

Supporting Information for:

## Selective 2'-Hydroxyl Acylation Analyzed by Protection from Exoribonuclease

Kady-Ann Steen, Arun Malhotra and Kevin M. Weeks\*

\*correspondence, weeks@unc.edu

### Experimental Procedures

**Screening of Candidate RNases.** Recombinant RNase R enzymes from *Escherichia coli*,<sup>1</sup> *Mycoplasma genitalium*<sup>2</sup> and *Aquifex aeolicus* were evaluated to identify an enzyme that efficiently and non-specifically degrades RNA (including highly structured RNA), is quantitatively inhibited by 2'-*O*-adducts, and can be fully and permanently inactivated. All three enzymes efficiently degraded structured RNA. The *E. coli* and *M. genitalium* enzymes are additionally readily inactivated by a simple heating step (95 °C, 3 min) whereas the *A. aeolicus* enzyme is very difficult to heat inactivate. 2'-*O*-adducts caused significantly stronger stops with the *M. genitalium* enzyme than with the *E. coli* version. For these reasons, we focused on using the *M. genitalium* enzyme for detection of covalent adducts in RNA. RNase R from *M. genitalium* was purified as described<sup>2</sup> and used for all subsequent experiments. Enzyme purification should be performed using equipment separate from that used for RNA-based research.

**Heat Inactivation of RNase R.** RNase R enzymes require Mg<sup>2+</sup> for activity and can be immediately inactivated by addition of excess EDTA. The enzyme is also permanently inactivated by heat denaturation. To assess the thermal inactivation of *M. genitalium* RNase R, individual 1 μL aliquots of the enzyme (1.5 μg/μL stock) were incubated at 95 °C [in 20 mM Tris (pH 8.0), 100 mM KCl]. Each aliquot was removed at time points ranging from 15 s to 10 min and placed on ice. To the heat-treated RNase, 8 μL of 5'-[<sup>32</sup>P]-labeled RNA in the same buffer containing 0.25 mM MgCl<sub>2</sub> were added. Reactions were subjected to the standard exoribonuclease digestion step (see below; incubation at 50 °C for 30 min) and resolved on a 10% denaturing polyacrylamide gel. RNase R activity was quantified as the fraction of remaining full length RNA. The half-life of *M. genitalium* RNase R is 18 sec at 95 °C. Although the exonuclease-detected SHAPE experiment does not require that the enzyme be inactivated, we recommend heating all RNase R-containing solutions for 3 min at 95 °C (~10 half-lives) to prevent introduction of RNase to other RNA experiments in the laboratory.

**RNAs.** DNA templates for the aptamer domain of the *Escherichia coli* thiamine pyrophosphate (TPP) riboswitch<sup>3</sup> both with and without 5' and 3' structure cassette flanking sequences<sup>4</sup> were generated by PCR [1 mL; 20 mM Tris (pH 8.4), 50 mM KCl, 2.5 mM MgCl<sub>2</sub>, 0.2 mM each dNTP, 250 nM each forward and reverse primer (IDT), 40 nM template (IDT), and 0.025 units/μL Taq polymerase; denaturation at 95 °C, 45 s; annealing at 55 °C, 30 s; elongation at 72 °C, 1 min; 35 cycles]. The PCR product was recovered by ethanol precipitation and resuspended in 200 μL TE [10 mM Tris (pH 8.0), 1 mM EDTA]. RNA constructs were synthesized by *in vitro* transcription [1 mL; 40 mM Tris (pH 8.0), 10 mM MgCl<sub>2</sub>, 10 mM dithiothreitol, 2 mM spermidine, 0.01% (v/v) Triton X-100, 4% (w/v) poly(ethylene) glycol 8000, 2 mM each NTP, 40 μL PCR-generated template, 0.1 mg/mL T7 RNA polymerase; 37 °C; 4 h]. Phosphorothioate-containing RNAs for sequencing were synthesized with the same protocol in 100 μL volumes using 10 μL PCR-generated template and contained 0.2 mM guanosine or cytidine α-thiotriphosphate (Glen Research). RNAs were purified by denaturing polyacrylamide gel electrophoresis (8% polyacrylamide, 7 M urea, 29:1 acrylamide:bisacrylamide, 0.4 mm × 28.5 cm × 23 cm; 32 W, 1.5 h), excised from the gel, recovered by overnight passive elution at 4 °C, and precipitation with ethanol. Purified RNAs were resuspended in TE and stored at -20 °C.

Purified RNAs were 5'-[<sup>32</sup>P]-radiolabeled by: (1) dephosphorylation [300 μL; 50 mM Tris (pH 8.5), 0.1 mM EDTA, 10 μM RNA (TPP RNA) or 1 μM (phosphorothioate-containing TPP RNA), 300 units SUPERase-In (Ambion), 200 units alkaline phosphatase (Roche); 50 °C; 1 h]; (2) phenol:chloroform:isoamyl alcohol extraction, ethanol precipitation, and resuspension in TE (storage at -20 °C); and (3) treatment with T4 polynucleotide kinase [20 μL; 80 pmol dephosphorylated RNA, 70 mM Tris (pH 7.6), 10 mM MgCl<sub>2</sub>, 5 mM DTT, 2 μL T4 polynucleotide kinase (NEB, 10,000 units/mL), 80 μCi [ $\gamma$ -<sup>32</sup>P]-ATP; 37 °C; 30 min]. Phosphorothioate RNA radiolabeling reactions contained 20-30 pmol RNA, 1 μL T4 polynucleotide kinase (10,000 units/mL), and 20 μCi [ $\gamma$ -<sup>32</sup>P]-ATP. Radiolabeled RNAs were purified by denaturing (8%) gel electrophoresis, excised from the gel, and recovered by overnight passive elution at 4 °C. The purified 5'-[<sup>32</sup>P]-labeled RNAs were precipitated with ethanol, resuspended in 10 mM HEPES (pH 8.0), and stored at -20 °C.

**Structure-Selective RNA Modification.** Unlabeled RNA with flanking sequences (5 pmol) or 5'-[<sup>32</sup>P]-labeled RNA with and without flanking sequences (~1 pmol) in 5 μL 1/2× TE (for modified RNAs analyzed by primer extension) or sterile water (for modified RNAs analyzed by RNase R degradation) was heated at 95 °C for 2 min, cooled on ice, treated with 3 μL 3.3× folding buffer [333 mM HEPES (pH 8.0), 333 mM NaCl, 33.3 mM MgCl<sub>2</sub>], and incubated at 37 °C for 10 min. The ligand (1 μL; 50 μM TPP) or sterile water was added and incubated at 37 °C for 20 min. After incubation, 9 μL of the folded RNA (+/- TPP) was added to 1 μL 80 mM 1M7 (in DMSO)<sup>5</sup> and incubated at 37 °C for 2 min. No-reagent control reactions were performed with 1 μL neat DMSO. The RNA was recovered by ethanol precipitation. For the 5'-[<sup>32</sup>P]-labeled RNA, a five-fold molar excess of EDTA was added to chelate Mg<sup>2+</sup> before ethanol precipitation. Unlabeled RNA was resuspended in 10 μL 1/2x TE and 5'-[<sup>32</sup>P]-labeled RNA was resuspended in 8 μL sterile water after being washed twice with 70% ethanol.

**RNase R Digestion.** 5'-[<sup>32</sup>P]-labeled RNA from the 1M7 or kethoxal modification reaction (8 μL) was supplemented with 1 μL 10× reaction buffer [200 mM Tris (pH 8.0), 1 M KCl, 2.5 mM MgCl<sub>2</sub>] and 1 μL *M. genitalium* RNase R<sup>2</sup> (4.5 μg/μL) and incubated at 50 °C for 30 min. [Note: *M. genitalium* RNase R activity is very sensitive to Mg<sup>2+</sup> concentration.] The RNase R enzyme was inactivated by the addition of 1 μL 100 mM EDTA followed by incubation at 95 °C for 3 min. The RNA fragments were recovered by precipitation with 2.5 vol ethanol plus 1 vol isopropanol, washed once with 70% ethanol, and resuspended in 2 μL sterile water and 7 μL stop dye [96% formamide, 1 mM EDTA (pH 8.0), bromophenol blue and xylene cyanol]. RNA fragments were separated by denaturing polyacrylamide gel electrophoresis (10% polyacrylamide, 29:1 acrylamide:bisacrylamide, 7 M urea, 1× TBE, 0.75 mm × 31 cm × 38.5 cm; 70 W) and visualized by phosphorimaging. Fragments were run for both 1.5 and 3.5-4 h to resolve most nucleotide positions.

**Kethoxal Modification.** 5'-[<sup>32</sup>P]-labeled RNA (1 μL) in 15 μL sterile water was heated at 95 °C for 2 min, cooled on ice, mixed with 2 μL 1 M HEPES (pH 8.0), and incubated at 70 °C for 3 min. The RNA was then treated with 2 μL 20 mM kethoxal (in sterile water, from USB) and incubated at 70 °C for 5 min.<sup>6</sup> The reaction was quenched with 20 μL 10 mM boric acid followed by ethanol precipitation, washed twice with 70% ethanol, and resuspended in 8 μL sterile water.

**Cleavage of Phosphorothioate-Containing RNA.** 5'-[<sup>32</sup>P]-labeled phosphorothioate-containing RNA was treated with 3 μL 85 mM iodine in ethanol for 3 min at room temperature.<sup>7</sup> The reaction was quenched with stop dye, and used directly for sequencing.

**Primer Extension.** The general procedure has been outlined previously.<sup>4,5</sup> DNA primers were 5'-end labeled with VIC or NED fluorophores (from Applied Biosystems). Unlabeled RNA from the 1M7 modification reaction (10 μL) was added to a fluorescently labeled DNA primer (5'-VIC-labeled GAA CCG GAC CGA AGC CCG; 3 μL, 0.3 μM) and allowed to anneal at 65 °C for 6 min and then cooled on ice. Reverse transcription buffer [6 μL; 167 mM Tris (pH 8.3), 250 mM KCl, 10 mM MgCl<sub>2</sub>, 1.67 mM each dNTP] and Superscript III (1 μL, 200 units) were added and incubated at 45 °C for 2 min, 52 °C for

20 min then 65 °C for 5 min. The reactions were quenched with 4 µL 50 mM EDTA. The cDNAs were recovered by ethanol precipitation, washed twice with 70% ethanol, dried in a SpeedVac for 5 min, and resuspended in 10 µL deionized formamide. Dideoxy sequencing ladders were produced using unlabeled, unmodified RNA, annealing a 5'-NED-labeled fluorescently labeled DNA primer (3 µL, 0.3 µM), and by adding 1 µL 2',3'-dideoxycytosine (10 mM) triphosphate before addition of Superscript III. cDNA fragments were separated by capillary electrophoresis using an Applied Biosystems 3130 DNA sequencing instrument.

**Data Analysis.** Band intensities visualized by gel electrophoresis were quantified using SAFA (Semi-Automated Footprinting Analysis)<sup>8</sup> and raw capillary electrophoresis traces were analyzed using SHAPEFinder.<sup>9</sup> SHAPE reactivity profiles for both the RNase R degradation- and primer extension-detected experiments were obtained by subtracting the no-reagent background from the (+) reaction intensities. All data sets were normalized by excluding the top 2% of the reactive nucleotides, averaging the next 10% of reactive nucleotides, and then dividing all intensities by this averaged value.

**RNase R Structure Model.** A homology model for the *M. genitalium* RNase R was generated using I-TASSER<sup>10-12</sup> with 2ix0<sup>13</sup> and 2vnu<sup>14</sup> as the template structures. The center-most model (by RMSD) is shown in Figure 1B. The RNA strand is from the 2ix1<sup>13</sup> and 2vnu structures; the adenosine residue visualized in the 2ix1 structure at position N-4 was changed to guanosine. RNase R likely uses a two Mg<sup>2+</sup> mechanism. Only one Mg<sup>2+</sup> ion has been visualized crystallographically and is shown, along with its coordinating aspartic acid residues, in Figure 1B.

Images were composed with Pymol (Delano Scientific). The secondary structure for the (+) ligand TPP riboswitch aptamer domain was adapted from Lescoute and Westhof.<sup>15</sup>

## References

- (1) Cheng, Z. F.; Deutscher, M. P. *J Biol Chem* **2002**, *277*, 21624-9.
- (2) Lalonde, M. S.; Zuo, Y.; Zhang, J.; Gong, X.; Wu, S.; Malhotra, A.; Li, Z. *RNA* **2007**, *13*, 1957-68.
- (3) Serganov, A.; Polonskaia, A.; Phan, A. T.; Breaker, R. R.; Patel, D. J. *Nature* **2006**, *441*, 1167-71.
- (4) Wilkinson, K. A.; Merino, E. J.; Weeks, K. M. *Nat Protoc* **2006**, *1*, 1610-6.
- (5) Mortimer, S. A.; Weeks, K. M. *J Am Chem Soc* **2007**, *129*, 4144-5.
- (6) Mortimer, S. A.; Johnson, J. S.; Weeks, K. M. *Biochemistry* **2009**, *48*, 2109-14.
- (7) Heidenreich, O.; Pieken, W.; Eckstein, F. *FASEB J* **1993**, *7*, 90-6.
- (8) Das, R.; Laederach, A.; Pearlman, S. M.; Herschlag, D.; Altman, R. B. *RNA* **2005**, *11*, 344-54.
- (9) Vasa, S. M.; Guex, N.; Wilkinson, K. A.; Weeks, K. M.; Giddings, M. C. *RNA* **2008**, *14*, 1979-90.
- (10) Zhang, Y. *BMC Bioinformatics* **2008**, *9*, 40.
- (11) Zhang, Y. *Proteins* **2007**, *69 Suppl 8*, 108-17.
- (12) Wu, S.; Skolnick, J.; Zhang, Y. *BMC Biol* **2007**, *5*, 17.
- (13) Frazao, C.; McVey, C. E.; Amblar, M.; Barbas, A.; Vonrhein, C.; Arraiano, C. M.; Carrondo, M. A. *Nature* **2006**, *443*, 110-4.
- (14) Lorentzen, E.; Basquin, J.; Tomecki, R.; Dziembowski, A.; Conti, E. *Mol Cell* **2008**, *29*, 717-28.
- (15) Lescoute, A.; Westhof, E. *Nucleic Acids Res* **2006**, *34*, 6587-604.

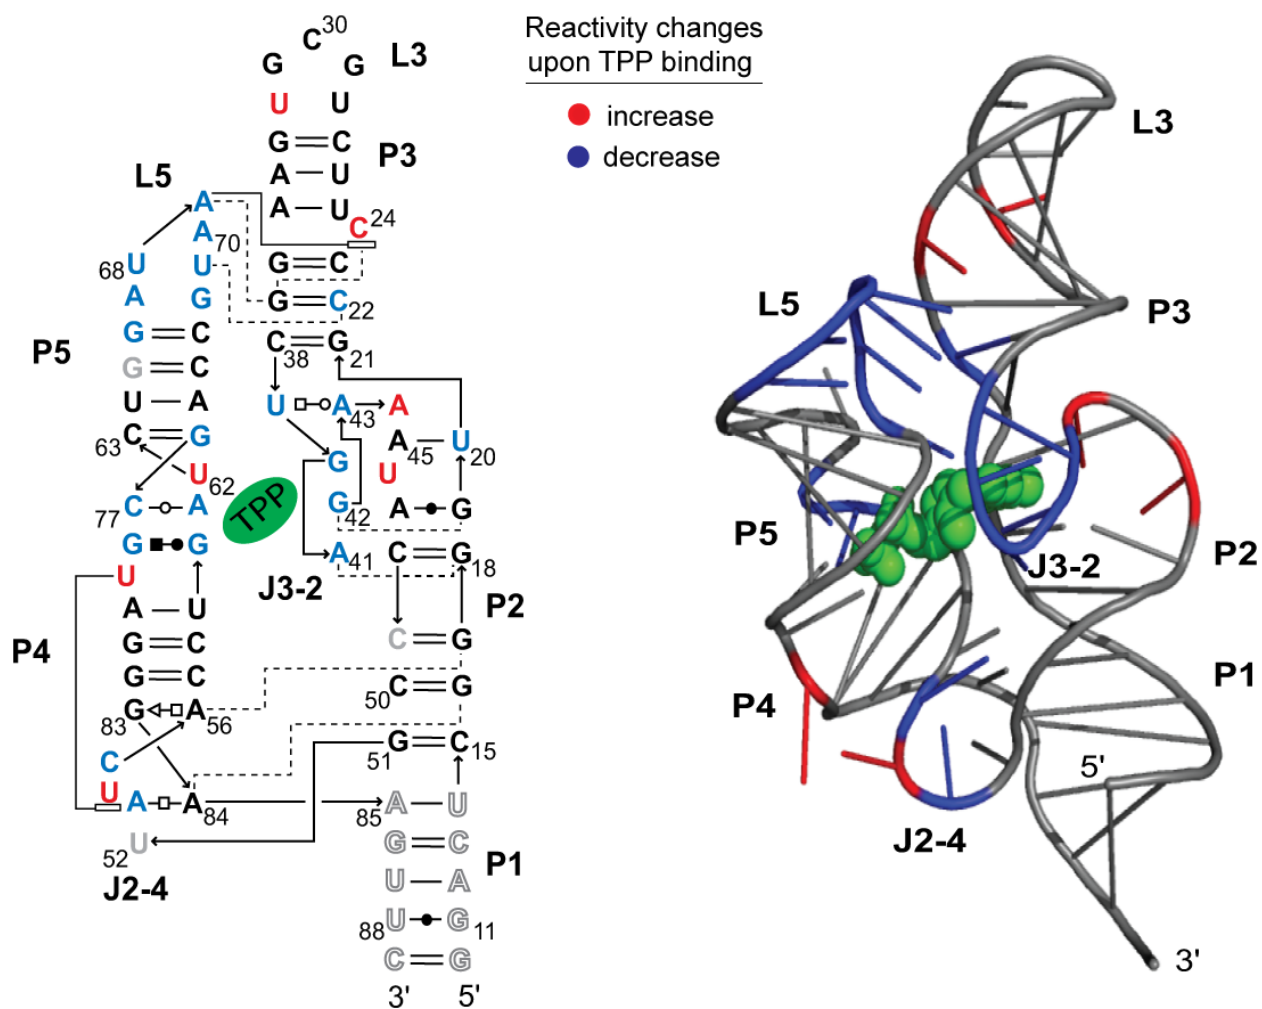

**Supporting Figure 1.** Base-pairing and tertiary structure of the ligand-bound TPP riboswitch showing structural features whose constituent nucleotides increase (red) or decrease (blue) in SHAPE reactivity when TPP binds.
